# Supplementary material for: Role of MicroRNA-103a Targeting ADAM10 in Abdominal Aortic Aneurysm
Source: Biomed Res Int. 2017 Mar 5;2017:9645874. doi: 10.1155/2017/9645874 (PMC5357520; doi:10.1155/2017/9645874)
Supplement: Supplementary file 1 — It was the three software to predict ADAM10's target site of micrna, including TargetScan Human 5.1, miRanda, RNAHybrid. [file 9645874.f1.zip]

Archive with 2 entries (2 files):
- FigS1_BMRI_1865769.doc
- FigS2_BMRI_1865770.doc
